# Supplementary material for: Excess adsorption of acetonitrile and water on MIL-100(Fe) and its potential application in mixed-mode chromatography
Source: Royal Society of Chemistry journal article supplement (doi:10.1039/c9nj03981c), 2019-01-01
Supplement: c9nj03981c1.pdf [file c9nj03981c1.pdf]

Electronic Supplementary Information for

## Excess adsorption of acetonitrile and water on MIL-100(Fe) and its potential application in mixed-mode chromatography

Yuiko Tasaki-Handa\*, Maho Yoshikawa, Shingo Saito, Masami Shibukawa Graduate School of Science and Engineering, Saitama University, Shimo-Okubo 255, Sakura-ku, Saitama

### 1 Partial molar volume of water and ACN in water/ACN binary solution

The partial molar volumes of acetonitrile (ACN) and water,  $\bar{V}_A$  and  $\bar{V}_W$ , respectively, in ACN/water binary solution are given as

$$\bar{V}_A = \frac{M_A}{\rho(c_A)} \cdot \left\{ 1 + \frac{c_A - 100}{\rho(c_A)} \cdot \frac{d\rho(c_A)}{dc_A} \right\} \quad (\text{S-1})$$

$$\bar{V}_W = \frac{M_W}{\rho(c_A)} \cdot \left\{ 1 + \frac{c_A}{\rho(c_A)} \cdot \frac{d\rho(c_A)}{dc_A} \right\} \quad (\text{S-2})$$

where  $M_A$  and  $M_W$  represent the molecular weights of ACN and water, respectively,  $c_A$  is weight concentration of ACN, and  $\rho(c_A)$  is density of ACN/water binary mixture as a function of  $c_A$ .

Relation between  $\rho(c_A)$  and  $c_A$  is shown in Fig. S2, where the solid curve was obtained by curve fitting and is given by

$$\rho(c_A) = -0.0468 \cdot \exp\left(\frac{c_A}{57.9}\right) + 1.05 \quad (\text{S-3})$$

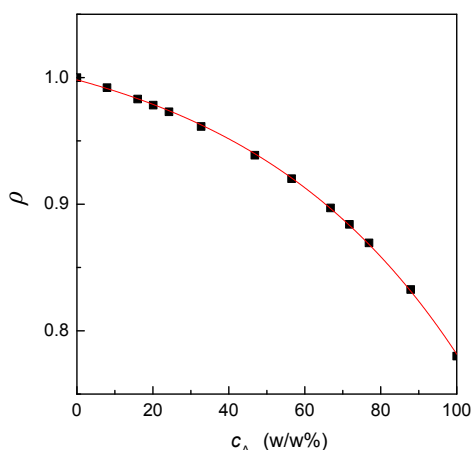

Fig. S 1: Relation between  $\rho(c_A)$  and  $c_A$ .

The values of  $x_A$  was calculated by using the relation between  $\overline{V}_A$  and  $x_A$  described as Eq. (4).

$$n_A \cdot \overline{V}_A = x_A \quad (\text{S-4})$$

$$n_A = \frac{10c_A\rho}{M_A} \quad (\text{S-5})$$

## 2 X-ray photoelectron spectroscopy (XPS) analysis

Fig. S2 shows XPS Fe(2p) spectrum obtained from as-synthesized MIL-100(Fe). There are no spectra assigned to Fe(II), indicating that Fe(II) was oxidized to Fe(III) via hydrothermal reaction.

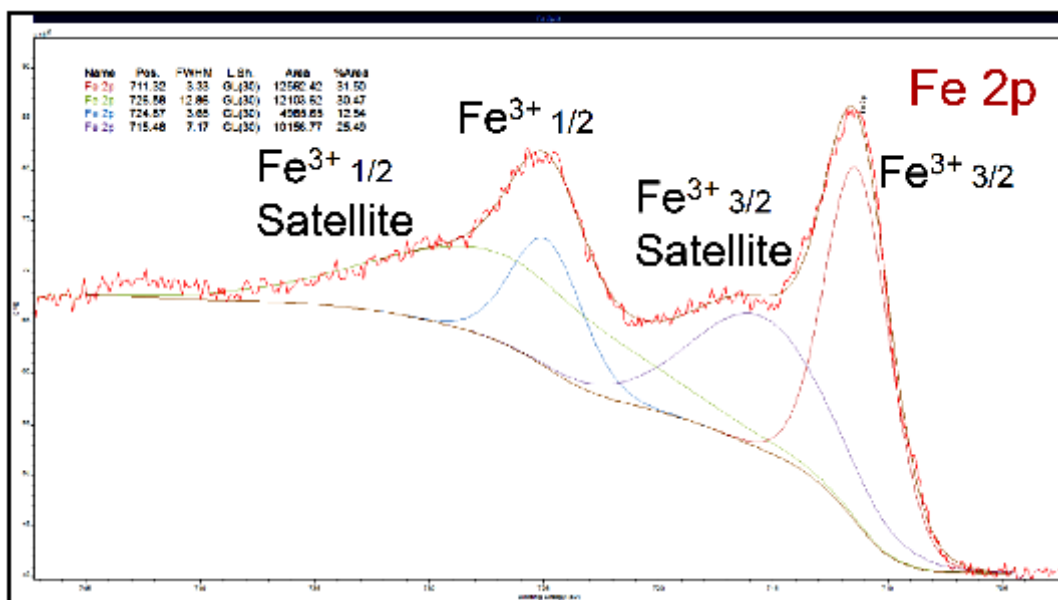

Fig. S 2: XPS spectra of the as-synthesized MIL-100(Fe).

### 3 FT-IR spectra

Fig. S3 shows FT-IR spectra of BTC and the as-synthesized substance. The spectra are completely different, indicating that the synthesized product does not contain BTC.

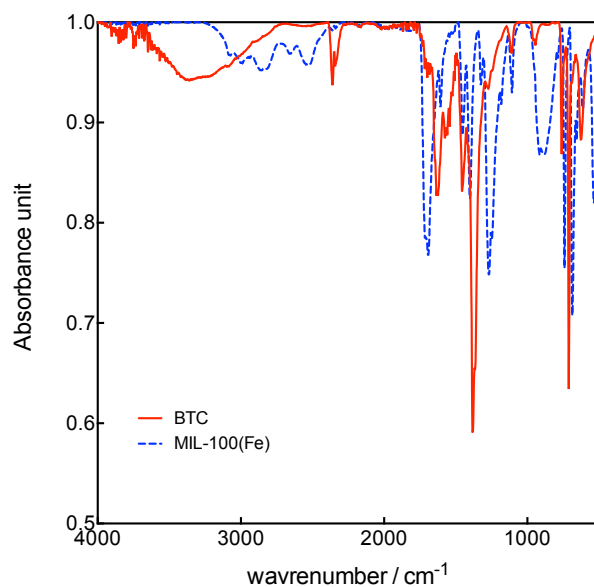

Fig. S 3: FT-IR spectra of BTC and the as-synthesized substance.

### 4 Repeatability of chromatographic measurements

Fig. S4 shows chromatograms when the same sample was repeatedly injected. The error was < 0.1%.

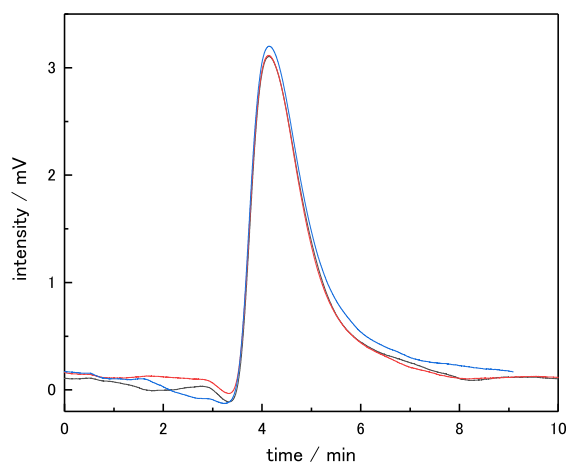

Fig. S 4: Chromatograms of solvent disturbance peak. Mobile phase: 90/10 vol% acetonitrile/water, sample: 100  $\mu$ L water-added 90/10 vol% acetonitrile/water.

## 5 Chromatograms of alcohols and aromatics

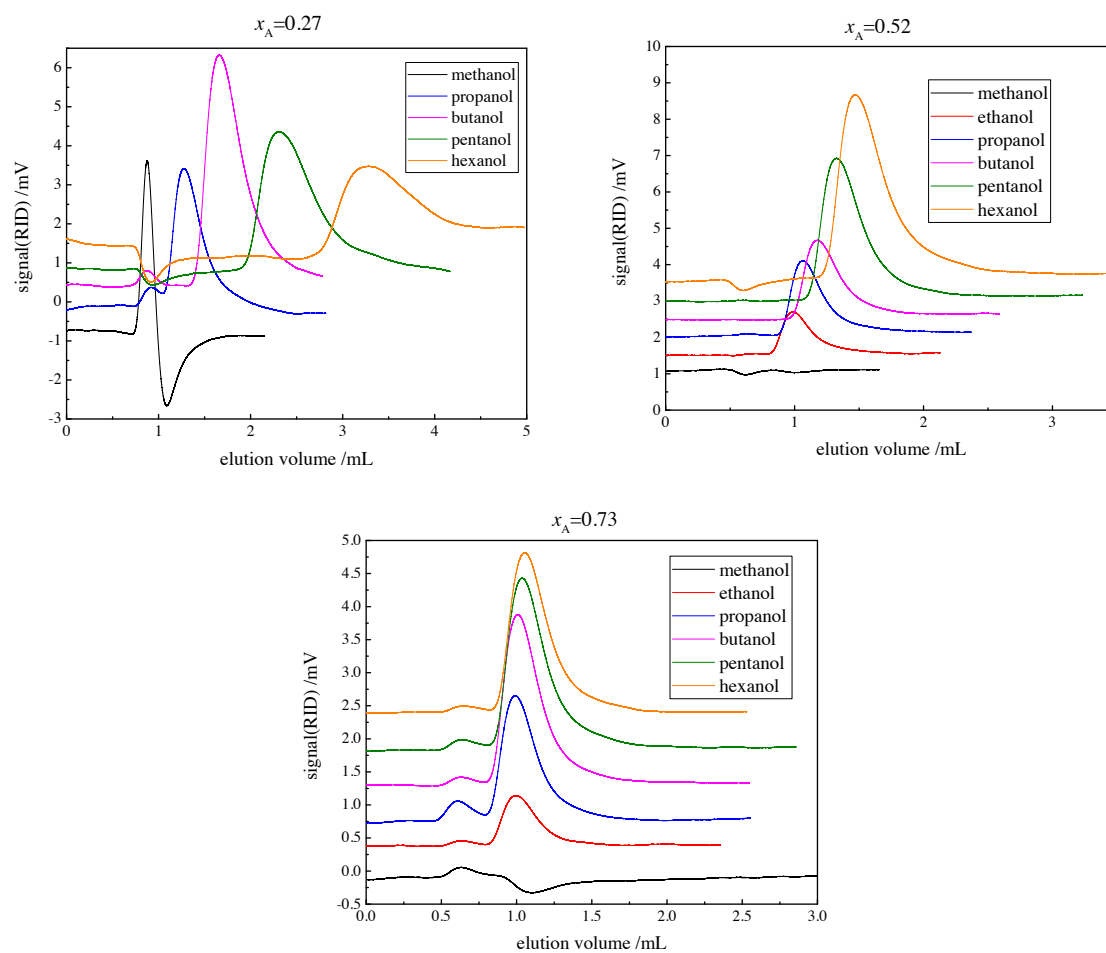

Fig. S 5: Chromatograms of alcohols at  $x_A=0.27$ , 0.52, and 0.73.

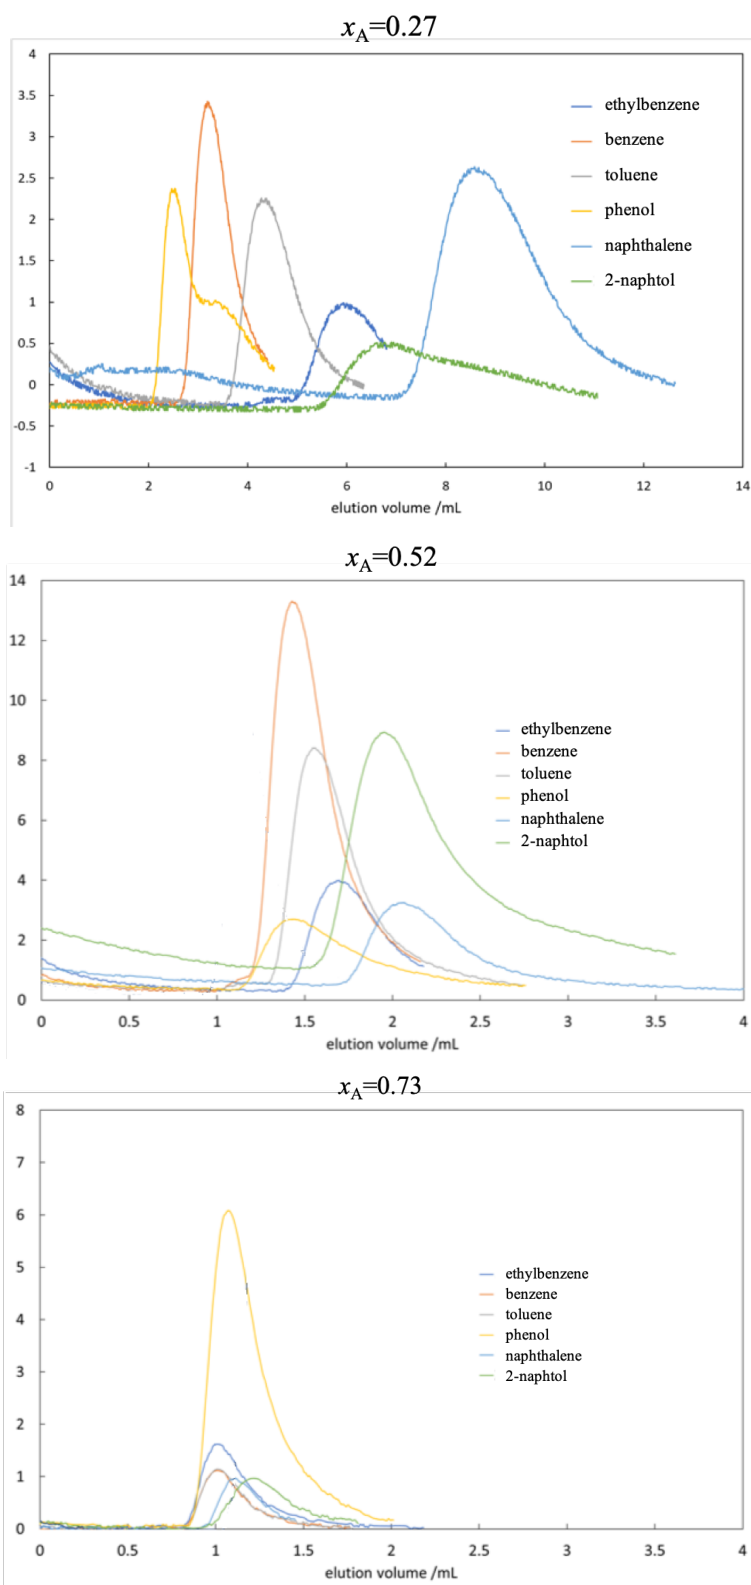

Fig. S 6: Chromatograms of aromatics at  $x_A=0.27$ , 0.52, and 0.73.
